# Supplementary material for: Beyond type 2 asthma biomarkers: risk stratification for NSAID-exacerbated respiratory disease
Source: PubMed Central journal article supplement — ERJ Open Res. 2024 Aug 5;10(4):00909-2023. doi: 10.1183/23120541.00909-2023 (PMC11299009; doi:10.1183/23120541.00909-2023), 2024-08-05
Supplement: 00909-2023.SUPPLEMENT.pdf [file 00909-2023.SUPPLEMENT.pdf]

## Methods

### *Study Population*

Healthy controls (HCs) fulfilled the criteria previously described [1]. Briefly, HCs should have no symptoms or history of asthma, other pulmonary diseases, rhinitis, CRSwNP, NSAID intolerance, or atopy and should have negative skin tests for a standard battery of aeroallergens. T2-asthma was diagnosed according to GINA guidelines [2, 3]. CRSwNP and N-ERD were diagnosed according to EPOS criteria [4]. Skin prick tests were performed as previously described [5] according to The European Academy of Allergy and Clinical Immunology (EAACI) recommendations [6]. Patients were divided into asthmatics, asthmatics with CRSwNP, and N-ERD. Patients were treated according to GINA guidelines [2]. Nevertheless, none were receiving oral corticosteroids or biologicals thus avoiding influences on gene expression.

### *Gene expression analysis*

**Table S1.** Primer pairs used in the qPCR analysis.

| GENE                  | Primer pairs 5'-3'sequences |                         |
|-----------------------|-----------------------------|-------------------------|
|                       | Forward                     | Reverse                 |
| <b><i>ALOX15</i></b>  | ACCTTCCTGCTCGCCTAGTGTT      | GGCTACAGAGAATGACGTTGGC  |
| <b><i>CLC</i></b>     | ATCAAAGGGCGACCACTTGCCCT     | CCCATACTCACGGCTGTTTCATG |
| <b><i>CYSLTR2</i></b> | ATGTCACCAGCATCAGGAGTGC      | TGTGACACTGCCGTTCTGCTCA  |
| <b><i>HRH4</i></b>    | CGATACCTGTCAGTCTCAAATGC     | GCCCATTCACTAAGAAGGCCAG  |
| <b><i>SMPD3</i></b>   | AACTGCTCCTCTGACGACAA        | GTGTCCAGCAGAGTACCGAT    |

### *Statistical analysis*

A p-value < 0.05 indicated statistical significance. The sample size was determined using statistical power and false positive report probability considerations to minimize the risk of Type I error. The normality distribution was evaluated using the Kolmogorov-Smirnov test. Proportions were compared using the Chi-squared test. ANOVA with DMS or Games-Howell post hoc tests was used to compare continuous parametric data. Krustal-Wallis (K-W) test was used for non-parametric data. Pearson's correlation coefficient (r) was used to test possible relations between variables. Receiver operating characteristic (ROC) analysis was used to assess the biomarkers' diagnostic performance, and cut-off values were calculated from ROC data using the Jouden index [7]. Sensitivity, specificity, positive (+), or negative (-) likelihood ratio (LR) were calculated to assess the diagnostic value of a test. Logistic regression analysis was used to predict disease phenotype based on potential biomarkers individually (simple

logistic regression) or in combination (multiple logistic regression). Age, sex, and atopy were used as potential confounding variables for the adjustment of the p-values.

#### References (supplementary material)

1. García-Sánchez A, Estravís M, Martín MJ, Pérez-Pazos J, Martín-García C, Gil-Melcón M, Ramos-González J, Eguiluz-Gracia I, Triviño JC, Isidoro-García M, Dávila I, Sanz C. PTGDR2 expression in peripheral blood as a potential biomarker in adult patients with asthma. *J. Pers. Med.* 2021; 11.
2. Global Initiative for Asthma. Difficult-to-treat & severe Asthma in adolescent and adult patients - diagnosis and management. *Glob. Initiast. Asthma* 2022.
3. Chung KF, Wenzel SE, Brozek JL, Bush A, Castro M, Sterk PJ, Adcock IM, Bateman ED, Bel EH, Bleecker ER, Boulet L-PP, Brightling C, Chanez P, Dahlen S-EE, Djukanovic R, Frey U, Gaga M, Gibson P, Hamid Q, Jajour NN, Mauad T, Sorkness RL, Teague WG. International ERS/ATS guidelines on definition, evaluation and treatment of severe asthma. *Eur. Respir. J.* 2014; 43: 343–373.
4. Fokkens WJ, Lund VJ, Mullol J, Bachert C, Alobid I, Baroody F, Cohen N, Cervin A, Douglas R, Gevaert P, Georgalas C, Goossens H, Harvey R, Hellings P, Hopkins C, Jones N, Joos G, Kalogjera L, Kern B, Kowalski M, Price D, Riechelmann H, Schlosser R, Senior B, Thomas M, Toskala E, Voegels R, Wang DY, Wormald PJ. European Position Paper on Rhinosinusitis and Nasal Polyps 2012. *Rhinol. Suppl.* 2012; 23: 3 p preceding table of contents, 1–298.
5. San Segundo-Val I, García-Sánchez A, Sanz C, Cornejo-García JA, Isidoro-García M, Dávila I. Promoter Genotyping and mRNA Expression - Based Analysis of the PTGDR Gene in Allergy. *J. Investig. Allergol. Clin. Immunol.* 2020; 30: 117–126.
6. Skin tests used in type I allergy testing Position paper. Sub-Committee on Skin Tests of the European Academy of Allergology and Clinical Immunology. *Allergy* 1989; 44: 11–59.
7. Youden WJ. Index for rating diagnostic tests. *Cancer* 1950; 3: 32–35.
8. MORPHEUS [Internet]. Available from: <https://software.broadinstitute.org/morpheus>.

### **Figure legends**

**Figure S1. (A)** Heatmap of RNAseq data [1] was plotted and computed with Morpheus [8]. Color representation was performed using expression values transformation subtraction of row median, divided by row median absolute deviation, with extreme values -1 and +1. Green represents downregulated genes, and red represents upregulated genes. **(B)** RNAseq data analysis of genes selected (pink squares in panel A) for the validation study.
